# Supplementary figures and images for: Supervised Analysis for Phenotype Identification: The Case of Heart Failure Ejection Fraction Class
Source: MDPI journal article supplement (doi:10.3390/bioengineering8060085), 2021-06-21

Supplementary  
Figure S1

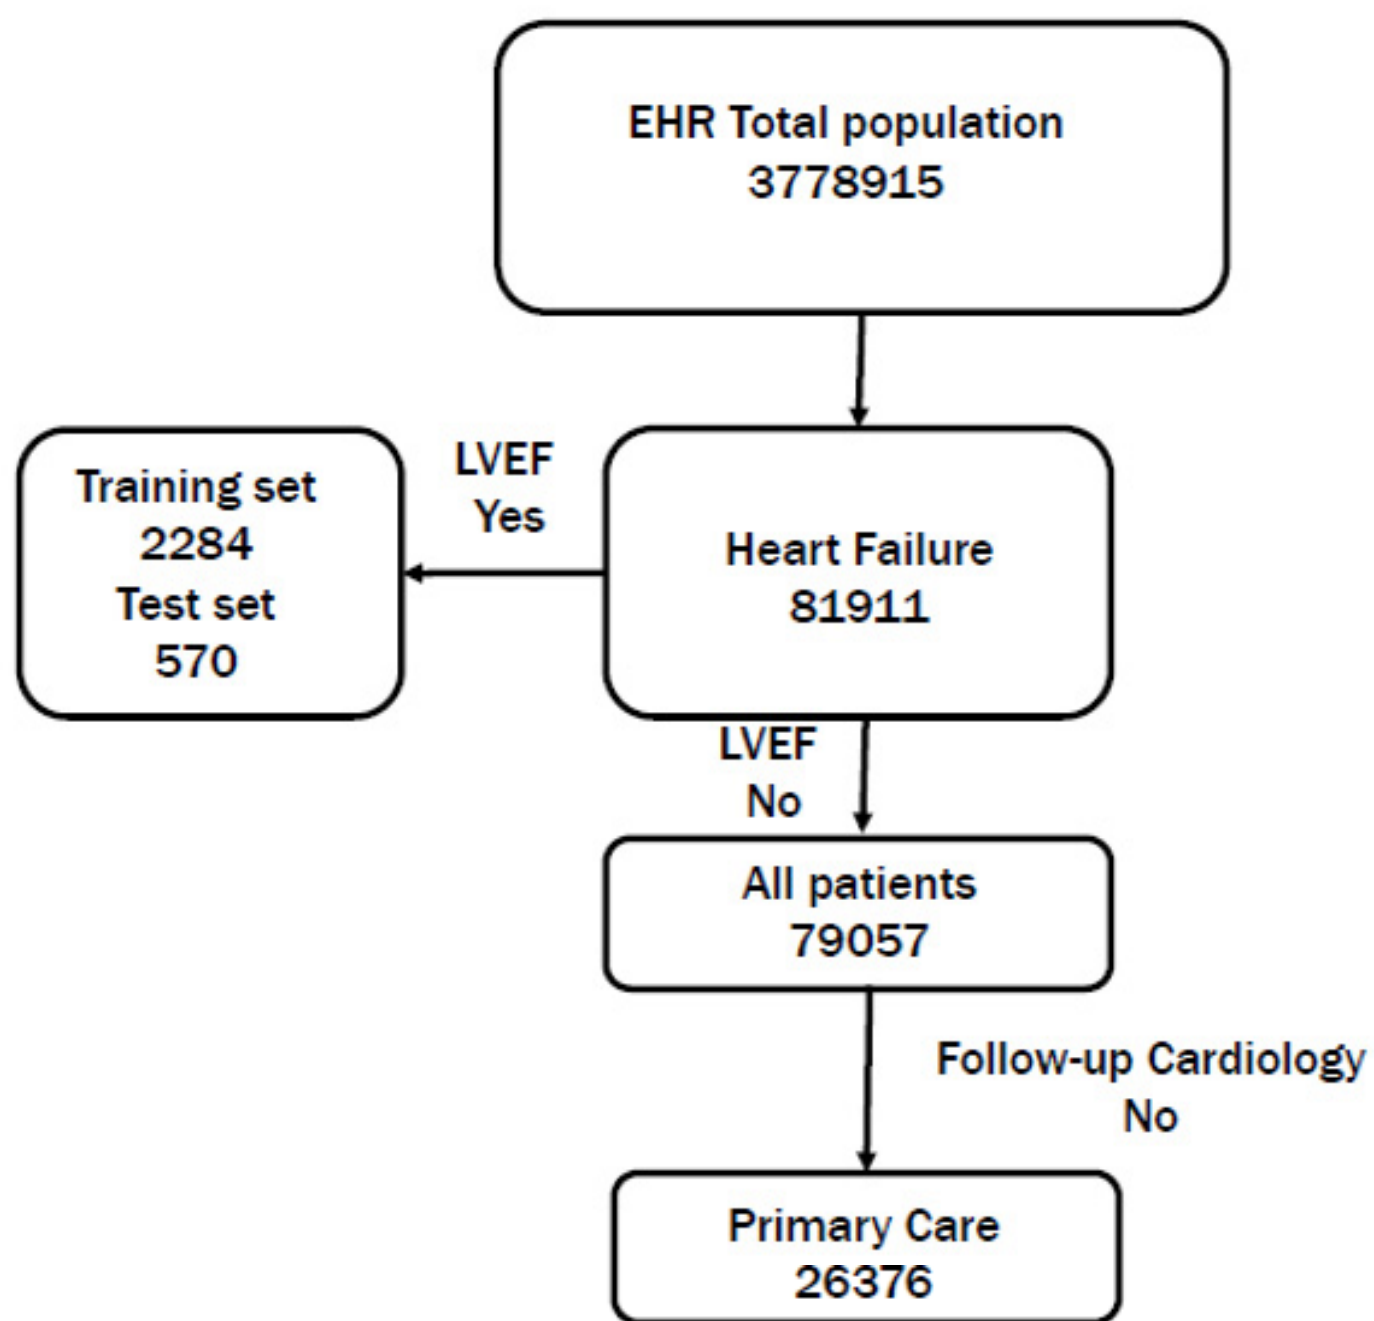

Supplement: s1 [file s1]
